# Supplementary material
Source: PubMed Central journal article supplement (PMC7964126)
Supplement: 1805_tables.pdf [file 1805_tables.pdf]

**On-line Table 1: Clinical data concerning the 22 patients included in the study**

| Patients | MRI        |     | GA     |                | History            | D       | AS   | CA  | E   | S       | SS | Day of Examination | Amiel-Tison Score           | Outcome Group |
|----------|------------|-----|--------|----------------|--------------------|---------|------|-----|-----|---------|----|--------------------|-----------------------------|---------------|
|          | Date (day) | Sex | BW (g) | (weeks + days) |                    |         |      |     |     |         |    |                    |                             |               |
| 1        | 6          | F   | 3050   | 41+2           | MSL                | NI      | 1/5  | No  | No  | Yes     | 3  | 8                  | Death day 19                | B             |
| 2        | 5          | F   | 3000   | 41+3           | FHRA               | NI      | 1/1  | No  | Yes | Yes     | 3  | 8                  | Death day 12                | B             |
| 3        | 4          | F   | 3730   | 40+2           | FHRA, MSL          | CS      | 3/10 | No  | No  | Yes     | 2  | 17                 | Moderate abnormalities      | A             |
| 4        | 3          | F   | 3070   | 40             | Head retention, NC | NI + IE | 1/3  | No  | No  | No      | 2  | 8                  | None or minor abnormalities | A             |
| 5        | 5          | F   | 3040   | 40+5           | FHRA, MSL          | NI + IE | 2/9  | No  | No  | Yes, SE | 3  | 12                 | Moderate abnormalities      | A             |
| 6        | 2          | F   | 4000   | 39             | NC                 | NI      | 0/ND | Yes | Yes | No      | 3  | 10                 | None or minor abnormalities | A             |
| 7        | 4          | M   | 2380   | 38             | FHRA, IUGR         | CS      | 6/7  | No  | No  | Yes     | 2  | 17                 | Moderate abnormalities      | A             |
| 8        | 3          | M   | 3620   | 41             | None               | NI      | 2/8  | Yes | No  | Yes     | 1  | 13                 | None or minor abnormalities | A             |
| 9        | 4          | M   | 3760   | 40             | Dystocia + MSL     | NI      | 1/3  | No  | No  | Yes     | 3  | 7                  | Moderate abnormalities      | A             |
| 10       | 4          | M   | 3510   | 40             | FHRA               | CS      | 0/ND | No  | Yes | Yes     | 3  | 13                 | Severe abnormalities        | B             |
| 11       | 5          | M   | 2800   | 39             | FHRA               | CS      | 5/8  | No  | No  | No      | 1  | 9                  | Moderate abnormalities      | A             |
| 12       | 6          | F   | 3700   | 41             | Major FHRA         | NI      | 3/3  | No  | No  | Gasps   | 3  | 4                  | Death day 6                 | B             |
| 13       | 5          | M   | 3450   | 39+2           | NC                 | NI      | 1/5  | No  | No  | Yes     | 2  | 6                  | Moderate abnormalities      | A             |
| 14       | 4          | F   | 2575   | 37+4           | None               | NI      | 0/ND | Yes | Yes | No      | 3  | 6                  | None or minor abnormalities | A             |
| 15       | 3          | F   | 2570   | 37             | FHRA               | CS      | 2/6  | No  | No  | No      | 3  | 3                  | None or minor abnormalities | A             |
| 16       | 3          | M   | 4480   | 40+4           | None               | CS      | 1/4  | No  | No  | No      | 3  | 4                  | None or minor abnormalities | A             |
| 17       | 1          | F   | 3100   | 40+2           | FHRA               | CS      | 0/0  | Yes | Yes | No      | 3  | ND                 | Death day 2                 | B             |
| 18       | 1          | F   | 3000   | 38             | NC, FHRA           | CS      | 1/1  | Yes | Yes | No      | 3  | ND                 | Death day 2                 | B             |
| 19       | 1          | M   | 3570   | 38+1           | FHRA               | NI      | 2/10 | Yes | Yes | Yes     | 2  | 5                  | Moderate abnormalities      | A             |
| 20       | 6          | F   | 2560   | 41+3           | FHRA               | NI      | 5/7  | Yes | Yes | No      | 2  | 5                  | None or minor abnormalities | A             |
| 21       | 3          | M   | 3450   | 38+2           | None               | CS      | 1/2  | No  | No  | Yes     | 3  | 6                  | None or minor abnormalities | A             |
| 22       | 1          | F   | 2050   | 38             | IUGR               | CS      | 2/6  | No  | No  | No      | 2  | 7                  | None or minor abnormalities | A             |

**On-line Table 2: Codifications for MRI score**

|   |                                                                                                                       |
|---|-----------------------------------------------------------------------------------------------------------------------|
| A | Brain swelling: 0, none; 2, yes                                                                                       |
| B | Grey/white matter differentiation: 0, present; 1, absent in one localization; 2, absent in more than one localization |
| C | High signal in the PLIC on T1WI: 0, Normal; 1, mild decrease; 2, absent                                               |
| D | Hyperintensity on T1WI sequences on PP and T: 0, None; 1, one localization; 2, more than 1 localization               |
| E | Hyperintensity on T2 sequences on PP and T: 0, None; 1, one localization; 2, more than one localization               |
| F | Brain stem abnormalities on T1WI and/or T2WI sequences: 0, None; 1, yes                                               |
| G | Cortex abnormalities on T1 and/or T2 sequences: 0, None; 1, one localization; 2, more than one localization           |
| H | White matter petechial abnormalities: 0, None; 1, one localization; 2, more than one localization                     |
| I | Subarachnoid hemorrhages: 0, None; 1, yes                                                                             |
| J | White-matter abnormalities in DWI: 0, None; 1, one localization; 2, more than one localization                        |
| K | Basal ganglia abnormalities in DWI: 0, None; 1, one localization; 2, more than one localization                       |
| L | Cerebral cortex abnormalities in DWI: 0, None; 1, one localization; 2, more than one localization                     |

**On-line Table 3: MRI score results for the 22 neonates**

| Case | A | B | C | D | E | F | G | H | I | J | K | L | Total | Outcome |
|------|---|---|---|---|---|---|---|---|---|---|---|---|-------|---------|
| 1    | 2 | 2 | 2 | 1 | 0 | 1 | 2 | 0 | 0 | 2 | 0 | 0 | 12    | B       |
| 2    | 0 | 0 | 1 | 0 | 0 | 0 | 1 | 0 | 0 | 0 | 2 | 0 | 4     | B       |
| 3    | 0 | 0 | 1 | 0 | 0 | 0 | 0 | 0 | 0 | 0 | 0 | 0 | 1     | A       |
| 4    | 0 | 0 | 1 | 0 | 2 | 0 | 0 | 0 | 0 | 0 | 0 | 0 | 3     | A       |
| 5    | 0 | 1 | 0 | 0 | 0 | 0 | 1 | 0 | 0 | 2 | 1 | 2 | 7     | A       |
| 6    | 0 | 0 | 1 | 0 | 1 | 0 | 0 | 0 | 0 | 0 | 0 | 0 | 2     | A       |
| 7    | 0 | 0 | 1 | 0 | 0 | 0 | 0 | 0 | 0 | 0 | 0 | 0 | 1     | A       |
| 8    | 0 | 0 | 1 | 0 | 0 | 0 | 1 | 0 | 1 | 0 | 0 | 1 | 4     | A       |
| 9    | 0 | 0 | 1 | 0 | 2 | 1 | 0 | 0 | 1 | 2 | 0 | 0 | 7     | A       |
| 10   | 2 | 0 | 2 | 0 | 2 | 1 | 2 | 0 | 1 | 2 | 2 | 2 | 16    | B       |
| 11   | 0 | 0 | 0 | 1 | 1 | 1 | 0 | 2 | 0 | 2 | 0 | 0 | 7     | A       |
| 12   | 2 | 2 | 2 | 0 | 2 | 1 | 2 | 0 | 1 | 2 | 2 | 2 | 18    | B       |
| 13   | 0 | 0 | 1 | 0 | 0 | 1 | 0 | 1 | 0 | 1 | 0 | 0 | 4     | A       |
| 14   | 0 | 0 | 2 | 2 | 0 | 0 | 0 | 2 | 1 | 2 | 0 | 0 | 9     | A       |
| 15   | 0 | 0 | 2 | 2 | 0 | 0 | 0 | 0 | 0 | 2 | 0 | 0 | 6     | A       |
| 16   | 0 | 0 | 0 | 0 | 0 | 0 | 0 | 0 | 1 | 0 | 0 | 0 | 1     | A       |
| 17   | 0 | 0 | 2 | 0 | 0 | 0 | 0 | 0 | 0 | 2 | 2 | 0 | 6     | B       |
| 18   | 0 | 1 | 0 | 0 | 2 | 0 | 1 | 0 | 0 | 2 | 2 | 0 | 8     | B       |
| 19   | 0 | 1 | 1 | 1 | 0 | 0 | 1 | 0 | 1 | 2 | 0 | 1 | 8     | A       |
| 20   | 0 | 0 | 1 | 1 | 0 | 0 | 0 | 0 | 0 | 2 | 0 | 0 | 4     | A       |
| 21   | 0 | 0 | 0 | 2 | 2 | 1 | 0 | 0 | 0 | 2 | 2 | 0 | 9     | A       |
| 22   | 0 | 0 | 1 | 0 | 0 | 0 | 0 | 0 | 0 | 2 | 0 | 0 | 3     | A       |

**Note:**—The abnormalities listed in table 2 are summed in table 3 for each case to generate a score (total).

**On-line Table 4: Diffusion tensor imaging results in the 22 patients (ADC:  $\times 10^{-3}$  mm/s<sup>2</sup>)**

| Patients        | PLIC  |       |       |       |       |       | PP    |       |       |       |       |       | CP    |       |       |       |       |       |
|-----------------|-------|-------|-------|-------|-------|-------|-------|-------|-------|-------|-------|-------|-------|-------|-------|-------|-------|-------|
|                 | Right |       | Left  |       | Mean  |       | Right |       | Left  |       | Mean  |       | Right |       | Left  |       | Mean  |       |
|                 | FA    | ADC   |
| 1 <sup>a</sup>  | 0.282 | 0.673 | 0.21  | 0.715 | 0.246 | 0.694 | 0.139 | 0.729 | 0.113 | 0.713 | 0.126 | 0.721 | 0.211 | 2.219 | 0.265 | 1.495 | 0.238 | 1.857 |
| 2 <sup>a</sup>  | 0.378 | 0.774 | 0.356 | 0.745 | 0.367 | 0.76  | 0.127 | 0.797 | 0.123 | 0.785 | 0.125 | 0.791 | 0.334 | 1.445 | 0.24  | 1.521 | 0.287 | 1.483 |
| 3               | 0.399 | 1.137 | 0.442 | 1.098 | 0.421 | 1.117 | 0.12  | 1.139 | 0.127 | 1.155 | 0.123 | 1.147 | 0.333 | 1.802 | 0.39  | 1.502 | 0.361 | 1.652 |
| 4               | 0.466 | 1.096 | 0.413 | 1.061 | 0.44  | 1.078 | 0.175 | 1.143 | 0.133 | 1.13  | 0.154 | 1.136 | 0.387 | 1.465 | 0.327 | 1.421 | 0.357 | 1.443 |
| 5               | 0.331 | 1.069 | 0.446 | 1.003 | 0.389 | 1.036 | 0.145 | 1.107 | 0.144 | 1.056 | 0.144 | 1.082 | 0.366 | 1.457 | 0.374 | 1.074 | 0.37  | 1.265 |
| 6               | 0.449 | 1.19  | 0.371 | 1.131 | 0.41  | 1.161 | 0.151 | 1.286 | 0.156 | 1.279 | 0.153 | 1.282 | 0.383 | 1.666 | 0.355 | 1.319 | 0.369 | 1.493 |
| 7               | 0.443 | 1.152 | 0.418 | 1.121 | 0.43  | 1.136 | 0.123 | 1.203 | 0.127 | 1.195 | 0.125 | 1.199 | 0.382 | 1.931 | 0.386 | 1.313 | 0.384 | 1.622 |
| 8               | 0.468 | 1.163 | 0.496 | 1.099 | 0.483 | 1.131 | 0.191 | 1.153 | 0.199 | 1.132 | 0.195 | 1.142 | 0.413 | 1.257 | 0.392 | 2.028 | 0.402 | 1.643 |
| 9               | 0.447 | 1.058 | 0.509 | 1.035 | 0.478 | 1.047 | 0.151 | 1.142 | 0.157 | 1.11  | 0.154 | 1.126 | 0.427 | 1.264 | 0.444 | 1.08  | 0.436 | 1.172 |
| 10 <sup>a</sup> | 0.406 | 0.734 | 0.459 | 0.697 | 0.433 | 0.716 | 0.131 | 0.875 | 0.181 | 0.838 | 0.156 | 0.856 | 0.305 | 1.711 | 0.32  | 1.505 | 0.312 | 1.608 |
| 11              | 0.422 | 1.142 | 0.488 | 1.124 | 0.455 | 1.133 | 0.167 | 1.285 | 0.188 | 1.254 | 0.178 | 1.270 | 0.405 | 1.365 | 0.469 | 1.141 | 0.437 | 1.253 |
| 12 <sup>a</sup> | 0.424 | 0.6   | 0.45  | 0.538 | 0.437 | 0.569 | 0.211 | 0.594 | 0.195 | 0.561 | 0.203 | 0.577 | 0.307 | 0.644 | 0.293 | 0.718 | 0.3   | 0.681 |
| 13              | 0.549 | 1.08  | 0.528 | 1.071 | 0.539 | 1.076 | 0.152 | 1.167 | 0.171 | 1.153 | 0.162 | 1.160 | 0.417 | 1.517 | 0.376 | 1.389 | 0.396 | 1.453 |
| 14              | 0.472 | 1.154 | 0.467 | 1.135 | 0.47  | 1.144 | 0.137 | 1.264 | 0.146 | 1.277 | 0.141 | 1.270 | 0.384 | 1.59  | 0.358 | 1.788 | 0.371 | 1.59  |
| 15              | 0.483 | 1.133 | 0.463 | 1.104 | 0.474 | 1.119 | 0.151 | 1.264 | 0.15  | 1.282 | 0.150 | 1.273 | 0.35  | 1.159 | 0.366 | 1.2   | 0.358 | 1.18  |
| 16              | 0.508 | 1.098 | 0.433 | 1.067 | 0.471 | 1.082 | 0.141 | 1.218 | 0.152 | 1.163 | 0.146 | 1.190 | 0.44  | 1.374 | 0.446 | 1.346 | 0.443 | 1.36  |
| 17 <sup>a</sup> | 0.436 | 0.568 | 0.341 | 0.555 | 0.389 | 0.562 | 0.156 | 0.544 | 0.181 | 0.541 | 0.169 | 0.542 | 0.327 | 0.895 | 0.385 | 1.067 | 0.356 | 0.981 |
| 18 <sup>a</sup> | 0.421 | 0.712 | 0.401 | 0.74  | 0.411 | 0.726 | 0.125 | 0.9   | 0.132 | 0.896 | 0.128 | 0.899 | 0.392 | 1.308 | 0.315 | 1.531 | 0.353 | 1.42  |
| 19              | 0.574 | 1.055 | 0.478 | 1.089 | 0.527 | 1.072 | 0.183 | 1.191 | 0.155 | 1.179 | 0.169 | 1.185 | 0.399 | 1.028 | 0.408 | 1.51  | 0.403 | 1.269 |
| 20              | 0.44  | 1.066 | 0.448 | 1.076 | 0.445 | 1.071 | 0.149 | 1.158 | 0.144 | 1.141 | 0.147 | 1.149 | 0.339 | 1.177 | 0.361 | 1.595 | 0.35  | 1.386 |
| 21              | 0.426 | 1.143 | 0.378 | 1.067 | 0.402 | 1.105 | 0.139 | 1.147 | 0.19  | 1.127 | 0.165 | 1.137 | 0.333 | 1.216 | 0.304 | 1.54  | 0.319 | 1.378 |
| 22              | 0.498 | 0.882 | 0.527 | 0.854 | 0.513 | 0.868 | 0.146 | 0.981 | 0.15  | 0.99  | 0.148 | 0.986 | 0.356 | 0.997 | 0.404 | 1.155 | 0.38  | 1.076 |
| Mean            | 0.442 | 0.985 | 0.433 | 0.96  | 0.438 | 0.973 | 0.150 | 1.059 | 0.155 | 1.043 | 0.153 | 1.051 | 0.363 | 1.386 | 0.363 | 1.375 | 0.363 | 1.376 |
| SD              | 0.064 | 0.206 | 0.072 | 0.199 | 0.062 | 0.202 | 0.023 | 0.222 | 0.025 | 0.224 | 0.022 | 0.223 | 0.051 | 0.356 | 0.058 | 0.279 | 0.05  | 0.26  |

<sup>a</sup> indicates patients in group B.
